# Supplementary material for: Long intergenic noncoding RNA 00673 promotes non-small-cell lung cancer metastasis by binding with EZH2 and causing epigenetic silencing of HOXA5
Source: PubMed Central journal article supplement (PMC5464820; doi:10.18632/oncotarget.16158), 2017-03-13
Supplement: oncotarget-08-32696-s001.pdf [file oncotarget-08-32696-s001.pdf]

## Long intergenic noncoding RNA 00673 promotes non-small-cell lung cancer metastasis by binding with EZH2 and causing epigenetic silencing of HOXA5

### Supplementary Materials

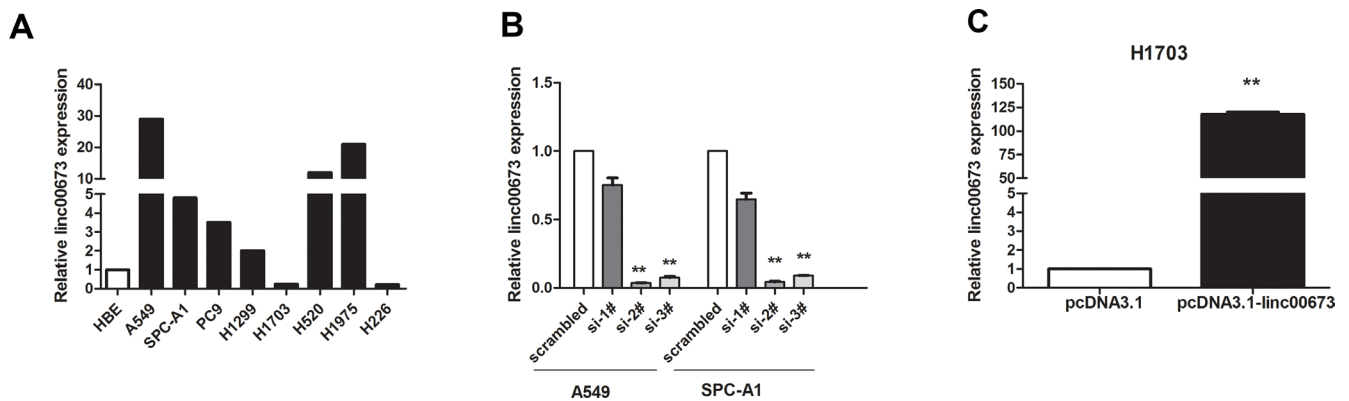

**Supplementary Figure 1: The expression levels of linc00673 and the optimization of transfection efficiency.** (A) Expression levels of linc00673 in 8 NSCLC cell lines and human bronchial epithelial cell (HBE) assessed on qRT-PCR analysis. (B) A549 and SPC-A1 were transfected with chemically synthesized siRNA-linc00673. (C) H1703 was transfected with pcDNA3.1-linc00673 vector.

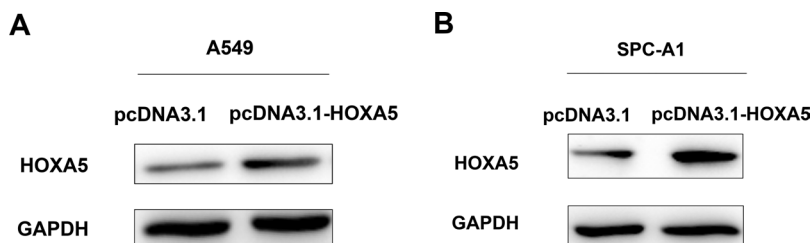

**Supplementary Figure 2: The protein level of HOXA5.** (A) A549 was transfected with pcDNA3.1 and pcDNA3.1-HOXA5. (B) SPC-A1 was transfected with pcDNA3.1 and pcDNA3.1-HOXA5.

**Supplementary Table 1: primers for qRT-PCR**

---

|                                   |   |                         |
|-----------------------------------|---|-------------------------|
| linc00673                         | F | TACCACACCCTTTCTTGCCC    |
|                                   | R | ACACTGGCCTCTTTACACGG    |
| HOXA5                             | F | ATGCGCAAGCTGCACATAAG    |
|                                   | R | CGGGTCAGGTAACGGTTGAA    |
| GAPDH                             | F | GGGAGCCAAAAGGGTCAT      |
|                                   | R | GAGTCCTTCCACGATACCAA    |
| primers of HOXA5 promotor regions |   |                         |
| P219                              | F | AAACCTCACACACAGCCAATACC |
|                                   | R | ACACTAGCACAGGAGCCCCAGAC |
| P889                              | F | ATTTGTGATTTACTTGAGTCTTT |
|                                   | R | GGCGGGTTACTGGGGTCTTGCTT |
| F3                                | F | TTGGAGAAACACTACACAAAAGC |
| F4                                | R | TTGGAGAAATAAATCCTGCCCGC |

---
